# Supplementary material for: The second Phytophthora mating hormone defines interspecies biosynthetic crosstalk
Source: Springer Nature journal article supplement (doi:10.1038/nchembio.617), 2011-07-24
Supplement: 41589_2011_BFnchembio617_MOESM1_ESM.mol [file 41589_2011_BFnchembio617_MOESM1_ESM.mol]

  ChemDraw07071106572D

 24 23  0  0  0  0  0  0  0  0999 V2000
   -5.3655    0.2063    0.0000 C   0  0  0  0  0  0  0  0  0  0  0  0
   -4.6515   -0.2066    0.0000 C   0  0  0  0  0  0  0  0  0  0  0  0
   -3.9346    0.2063    0.0000 C   0  0  0  0  0  0  0  0  0  0  0  0
   -3.2206   -0.2066    0.0000 C   0  0  0  0  0  0  0  0  0  0  0  0
   -2.5036    0.2063    0.0000 C   0  0  0  0  0  0  0  0  0  0  0  0
   -1.7896   -0.2066    0.0000 C   0  0  0  0  0  0  0  0  0  0  0  0
   -1.0754    0.2063    0.0000 C   0  0  0  0  0  0  0  0  0  0  0  0
   -0.3585   -0.2066    0.0000 C   0  0  0  0  0  0  0  0  0  0  0  0
    0.3556    0.2063    0.0000 C   0  0  0  0  0  0  0  0  0  0  0  0
    1.0725   -0.2066    0.0000 C   0  0  0  0  0  0  0  0  0  0  0  0
    1.7865    0.2063    0.0000 C   0  0  0  0  0  0  0  0  0  0  0  0
    2.5034   -0.2066    0.0000 C   0  0  0  0  0  0  0  0  0  0  0  0
    3.2174    0.2063    0.0000 C   0  0  0  0  0  0  0  0  0  0  0  0
    3.9314   -0.2066    0.0000 C   0  0  0  0  0  0  0  0  0  0  0  0
    4.6484    0.2063    0.0000 C   0  0  0  0  0  0  0  0  0  0  0  0
    5.3626   -0.2066    0.0000 C   0  0  0  0  0  0  0  0  0  0  0  0
   -1.0754    1.0324    0.0000 C   0  0  0  0  0  0  0  0  0  0  0  0
    1.3247    0.8717    0.0000 O   0  0  0  0  0  0  0  0  0  0  0  0
    2.2913    0.8316    0.0000 C   0  0  0  0  0  0  0  0  0  0  0  0
    4.6484    1.0324    0.0000 C   0  0  0  0  0  0  0  0  0  0  0  0
   -6.0795   -0.2066    0.0000 O   0  0  0  0  0  0  0  0  0  0  0  0
    6.0795    0.2063    0.0000 O   0  0  0  0  0  0  0  0  0  0  0  0
   -3.9346    1.0321    0.0000 C   0  0  0  0  0  0  0  0  0  0  0  0
   -3.2206   -1.0324    0.0000 O   0  0  0  0  0  0  0  0  0  0  0  0
  1  2  1  0      
  2  3  1  0      
  3  4  1  0      
  4  5  1  0      
  5  6  1  0      
  6  7  1  0      
  7  8  1  0      
  8  9  1  0      
  9 10  1  0      
 10 11  1  0      
 11 12  1  0      
 12 13  1  0      
 13 14  1  0      
 14 15  1  0      
 15 16  1  0      
  7 17  1  6      
 11 18  1  1      
 11 19  1  6      
 15 20  1  1      
  1 21  1  0      
 16 22  1  0      
  3 23  1  1      
  4 24  2  0      
M  END
